# Supplementary material for: Identification of the kinase STK25 as an upstream activator of LATS signaling
Source: PubMed Central journal article supplement (PMC6449379; doi:10.1038/s41467-019-09597-w), 2019-04-04
Supplement: 41467_2019_9597_MOESM1_ESM.pdf [file 41467_2019_9597_MOESM1_ESM.pdf]

## **Supplementary Information**

### **Identification of STK25 as an upstream activator of LATS signaling.**

**Lim et al.**

This supplementary information section contains the following:

#### Supplementary figures 1-8

- Supplementary figure 1: pages 2-3
- Supplementary figure 2: pages 4-5
- Supplementary figure 3: page 6
- Supplementary figure 4: page 8
- Supplementary figure 5: page 9
- Supplementary figure 6: page 10
- Supplementary figure 7: page 11
- Supplementary figure 8: pages 12-16

#### Supplementary tables 1-5

- Supplementary table 1: page 17
- Supplementary table 2: page 18
- Supplementary table 3: page 19
- Supplementary table 4: page 20-21
- Supplementary table 5: pages 22

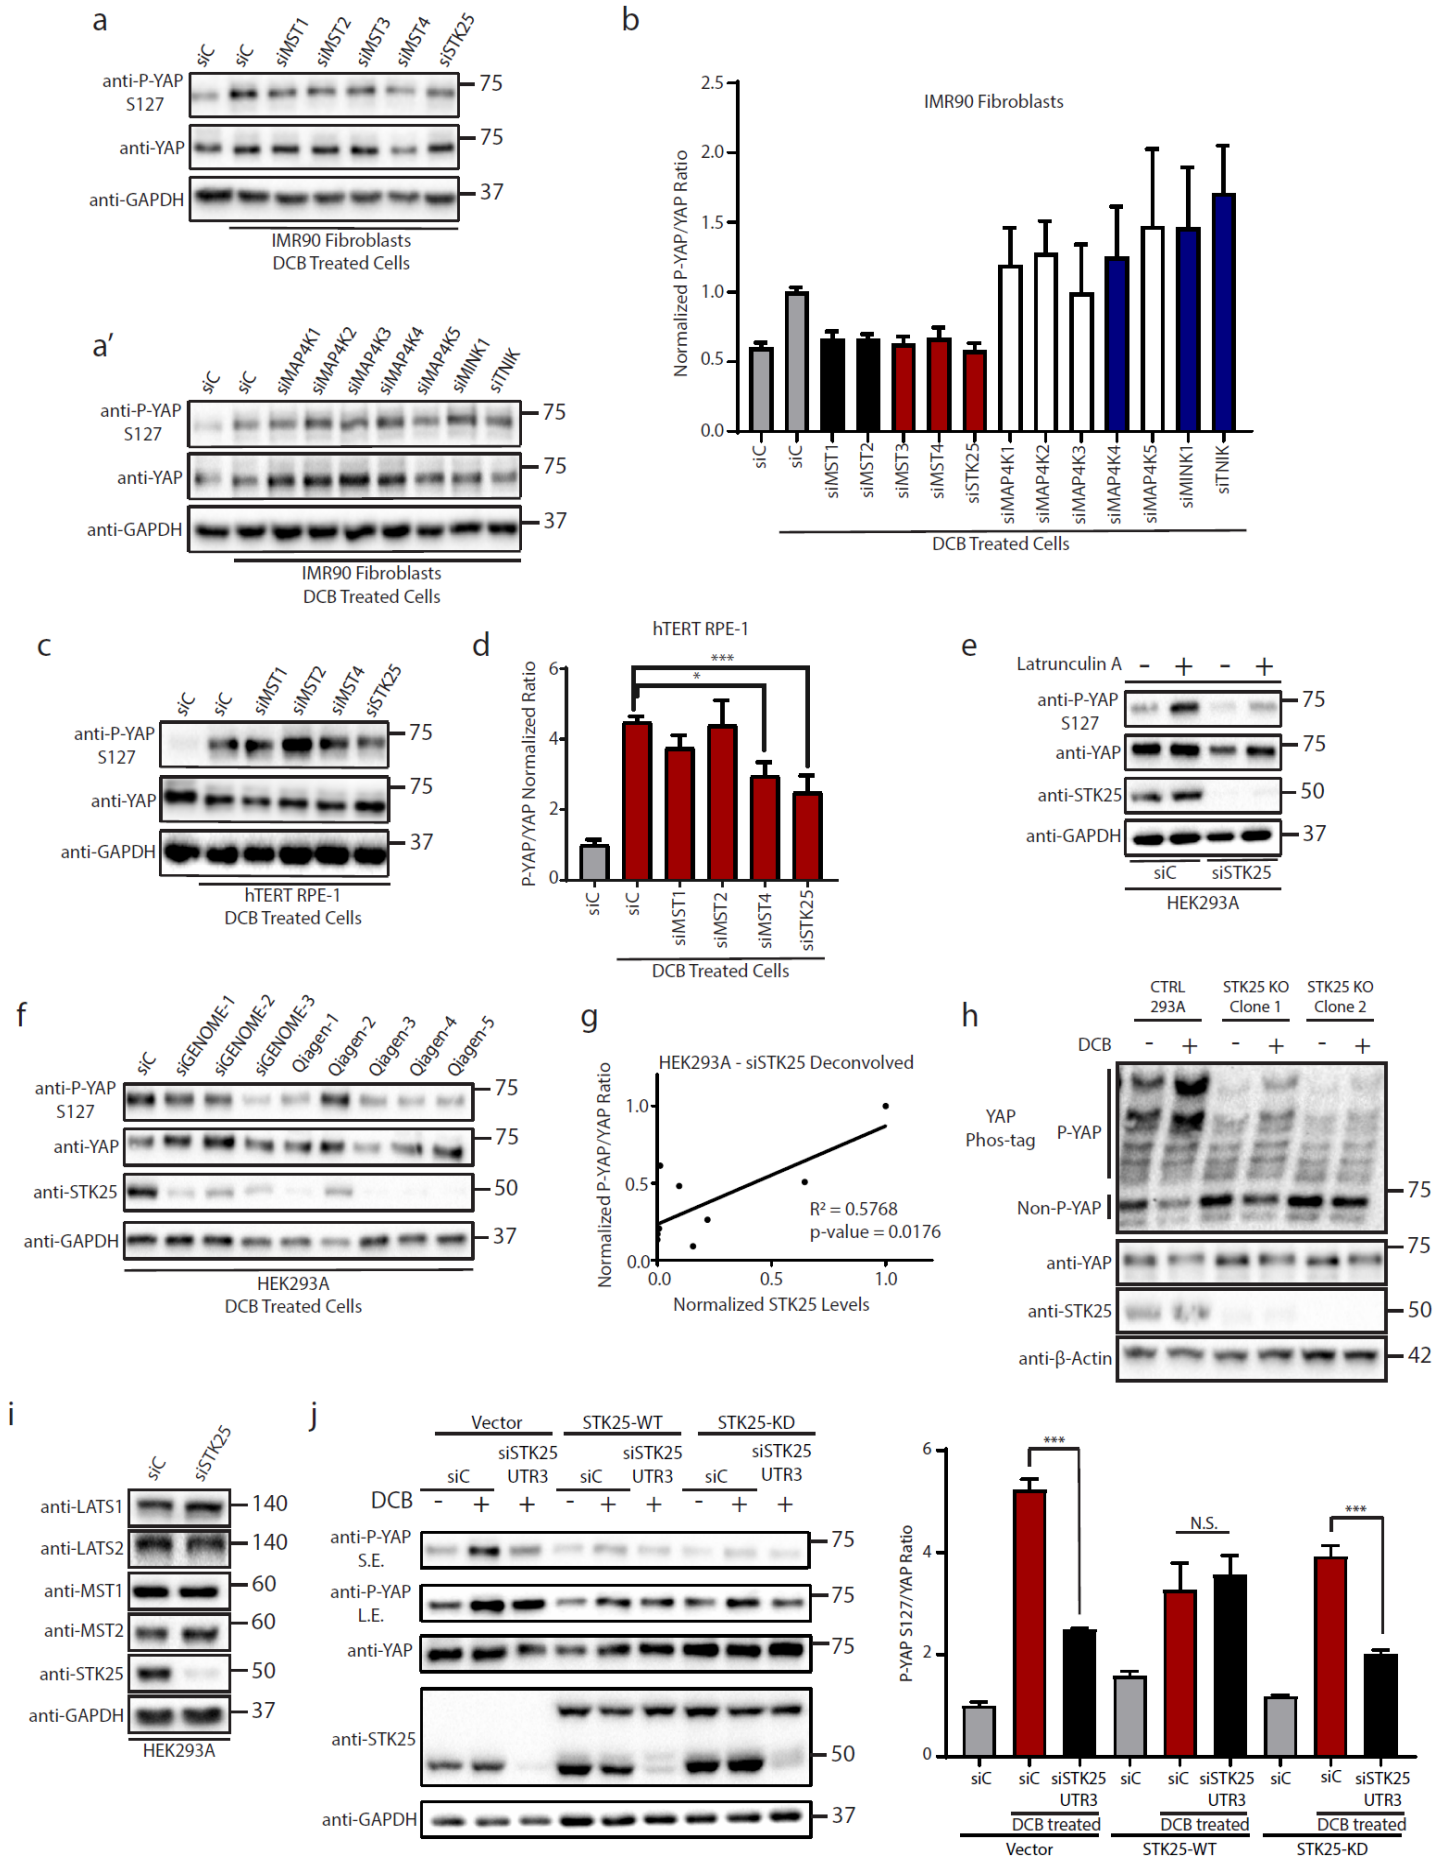

**Supplementary Figure 1. Loss of STK25 decreases YAP phosphorylation in response to actin disruption.**

**a.** Representative immunoblot of YAP phosphorylation following treatment with 10  $\mu$ M DCB in IMR90 fibroblasts transfected with the indicated siRNA. **b.** Quantitation of the IMR90 focused kinome screen (n=3 biological replicates, \*p<0.05 by One-Way ANOVA with Dunnett's post-hoc analysis). **c.** Representative immunoblot of YAP phosphorylation following treatment with 10  $\mu$ M DCB in hTERT-RPE-1 cells transfected with the siRNA. **d.** Quantitation of the RPE-1 secondary kinome screen (n=4 biological replicates, \*p<0.05, \*\*\*p<0.001 by One-Way ANOVA with Dunnett's post-hoc analysis). **e.** Representative immunoblot of YAP phosphorylation following treatment with 1  $\mu$ g/mL Latrunculin A in HEK293A cells transfected with the indicated siRNA. **f.** Immunoblot and **g.** quantification of YAP phosphorylation and STK25 protein levels following treatment with 10  $\mu$ M DCB in HEK293A cells transfected with the indicated siRNA. STK25 protein levels were normalized to GAPDH protein levels and plotted against the respective P-YAP/YAP ratios. Linear regression was performed to assess whether a correlation existed between levels of STK25 protein expression and P-YAP/YAP ratios (p=0.0176, Pearson's  $R^2 = 0.5768$ ). **h.** Global phosphorylation status of YAP was assessed using phos-tag gel electrophoresis in Control and STK25 KO 293A cells following treatment with 10  $\mu$ M DCB for one hour; DMSO served as vehicle control. **i.** Lysates collected from HEK293A cells transfected with either control siRNA or siRNAs targeting STK25 were assessed for perturbations in levels of total LATS1, LATS2, MST1, and MST2. **j.** Immunoblot and quantitation of phosphorylated YAP levels following treatment with 10  $\mu$ M DCB in HEK293A cells stably expressing wild-type STK25 (STK25-WT), kinase-dead STK25 (STK25-KD), or vector control (Vector) transfected with the indicated siRNAs. (n=3 biological replicates; \*\*\*p<0.001, N.S.: not significant; One-way ANOVA with Tukey's post-hoc analysis). S.E. stands for Short Exposure; L.E. stands for Long Exposure. All data presented as mean  $\pm$  SEM unless otherwise noted.

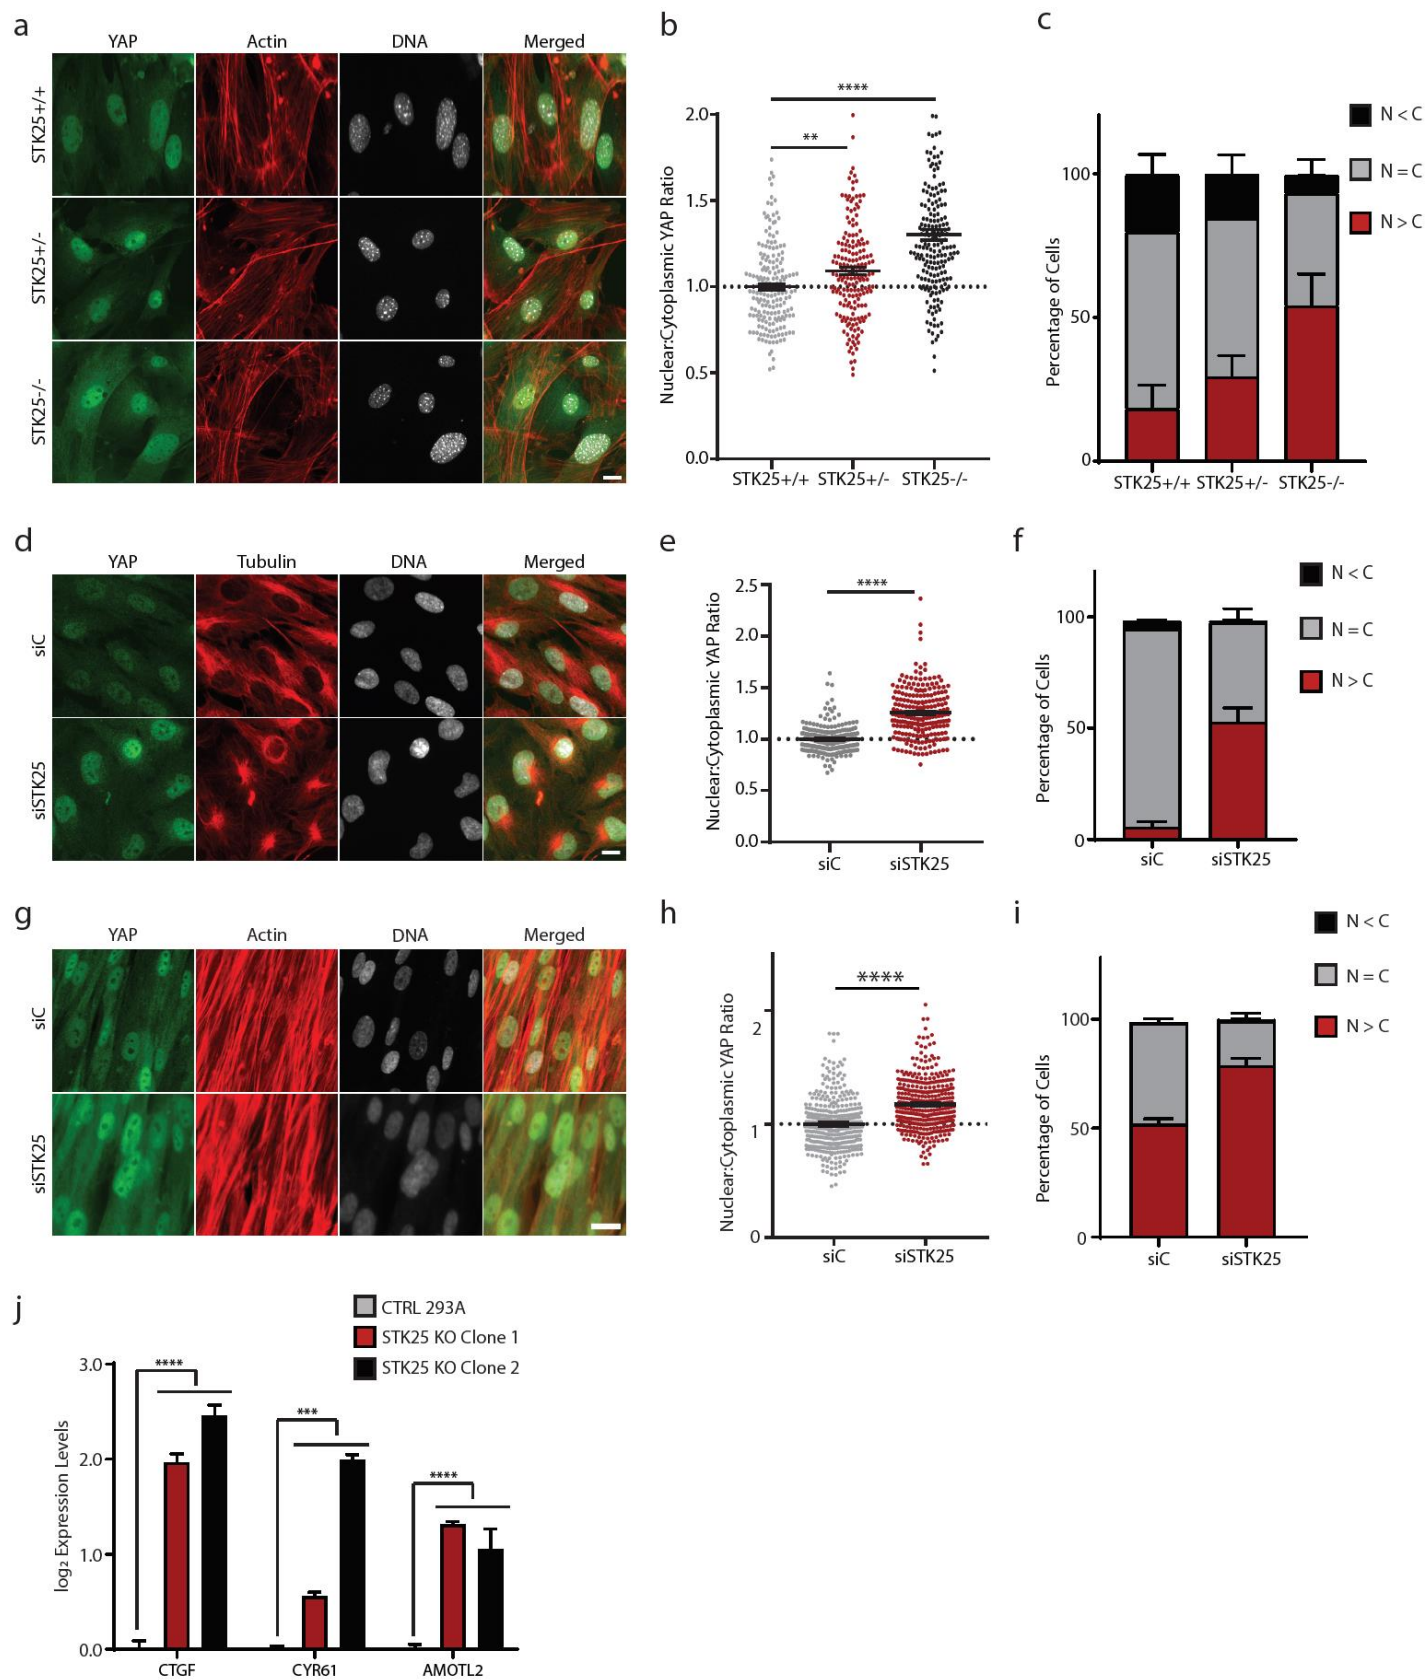

### Supplementary Figure 2. Loss of STK25 increases levels of active, nuclear YAP.

**a.** MEFs isolated from STK25<sup>+/+</sup>, STK25<sup>+/-</sup>, and STK25<sup>-/-</sup> mice were plated on coverslips and stained for YAP (Green), Actin (Red), and DNA (White). Scale bar, 20  $\mu$ m. **b.** YAP intensity was quantified and nuclear:cytoplasmic ratios were calculated for the MEF images (n>150 per group over 3 biological replicates;

**\*\*p<0.01, \*\*\*\*p<0.0001** by Kruskal-Wallis test with Dunn's post-test). **c.** YAP localization in the MEFs was quantified (n=3 biological replicates, N>C, YAP is enriched in the nucleus; N=C, YAP is evenly distributed between the nucleus and the cytoplasm; N<C, YAP is enriched in the cytoplasm). **d.** hTERT-RPE-1 transfected with the indicated siRNA were stained for YAP (Green), Tubulin (Red), and DNA (White). Scale bar, 20  $\mu$ m. **e.** YAP intensity was quantified and nuclear:cytoplasmic ratios were calculated for the RPE-1 experiments (n=225 over 3 biological replicates; \*\*\*\*p<0.0001 by Mann-Whitney test). **f.** YAP localization in the hTERT-RPE-1 cells was quantified (n=3 biological replicates, N>C, YAP is enriched in the nucleus; N=C, YAP is evenly distributed between the nucleus and the cytoplasm; N<C, YAP is enriched in the cytoplasm). **g.** IMR90 fibroblasts transfected with the indicated siRNA were stained for YAP (Green), Actin (Red), and DNA (White). Scale bar, 20  $\mu$ m. **h.** YAP intensity was quantified and nuclear:cytoplasmic ratios were calculated (n=300 per group over 4 biological replicates; \*\*\*\*p<0.0001, Mann-Whitney test). **i.** YAP localization in the IMR90 cells was quantified (n=4 biological replicates, N>C, YAP is enriched in the nucleus; N=C, YAP is evenly distributed between the nucleus and the cytoplasm; N<C, YAP is enriched in the cytoplasm). **j.** qPCR analysis of YAP-target gene expression in control and STK25 KO HEK293A cells (n=4 biological replicates; \*\*\*p<0.001, \*\*\*\*p<0.0001, One-way ANOVA with Dunnett's post-hoc analysis). All data presented as mean  $\pm$  SEM.

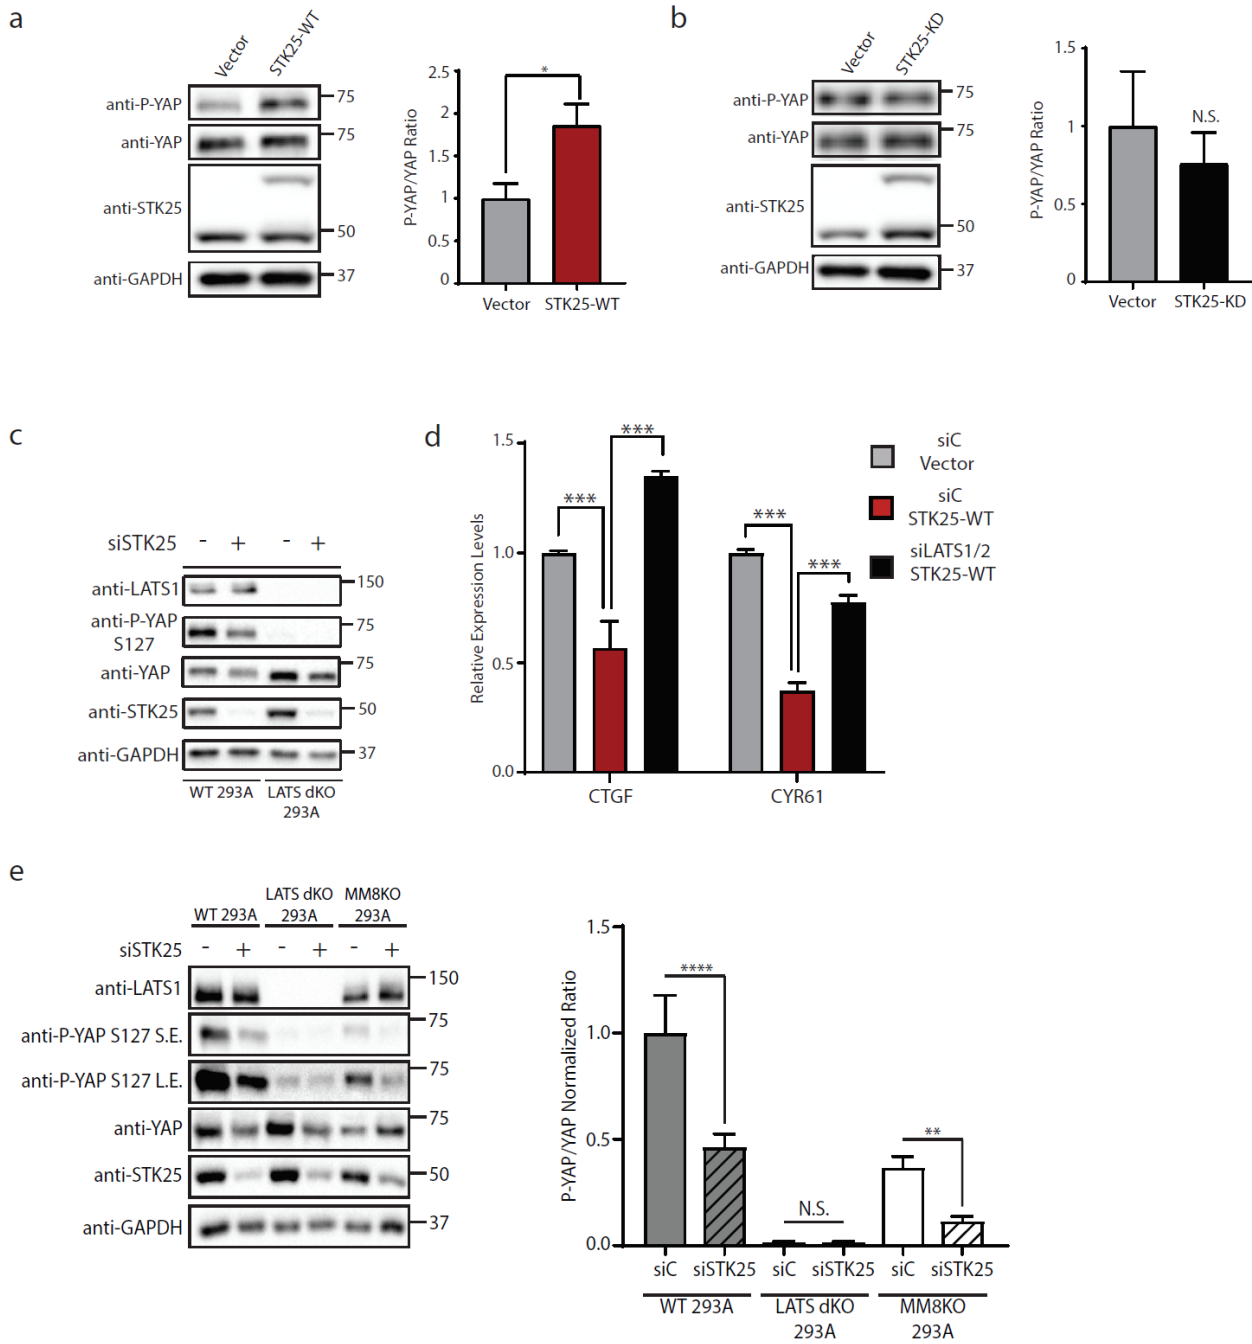

### Supplementary Figure 3. STK25 requires LATS1/2 for its inhibitory effects on YAP.

**a.** Immunoblot and quantitation of phosphorylated YAP levels in HEK293A cells stably expressing wild-type STK25 (STK25-WT) or vector control (Vector) (n=3 biological replicates; \*p<0.05, paired t-test). **b.** Immunoblot and quantitation of phosphorylation YAP levels in HEK293A cells stably expressing kinase-dead STK25 (STK25-KD) or vector control (Vector) (n=3 biological replicates; N.S. stands for not significant. paired t-test) **c.** Representative immunoblot of phosphorylated YAP following STK25 knockdown in wild-type and LATS dKO HEK293A. Cells were grown to confluence in order to activate Hippo signaling to induce YAP phosphorylation. **d.** qRT-PCR analysis of YAP-target gene expression in HEK293A cells stably overexpressing either wild-type STK25 (STK25-WT) or vector control (Vector) after transfection with control siRNA or siRNAs targeting LATS1 and LATS2 (n=3 biological replicates; \*\*\*p<0.001, One-way ANOVA with Dunnett's post-hoc analysis; DF=2, 6; F=30.08). **e.** Representative immunoblot and quantitation of phosphorylated YAP following STK25 knockdown in wild-type, LATS dKO, and MM8KO HEK293A cells. Cells were grown to confluence in order to activate Hippo signaling and promote YAP phosphorylation. (n=5 biological replicates, \*\*\*\*p<0.0001, \*\*p<0.01, N.S.: not significant, One-way ANOVA with Tukey's post-hoc analysis). S.E. stands for Short Exposure; L.E. stands for Long Exposure. (Corresponds to Fig. 3j).

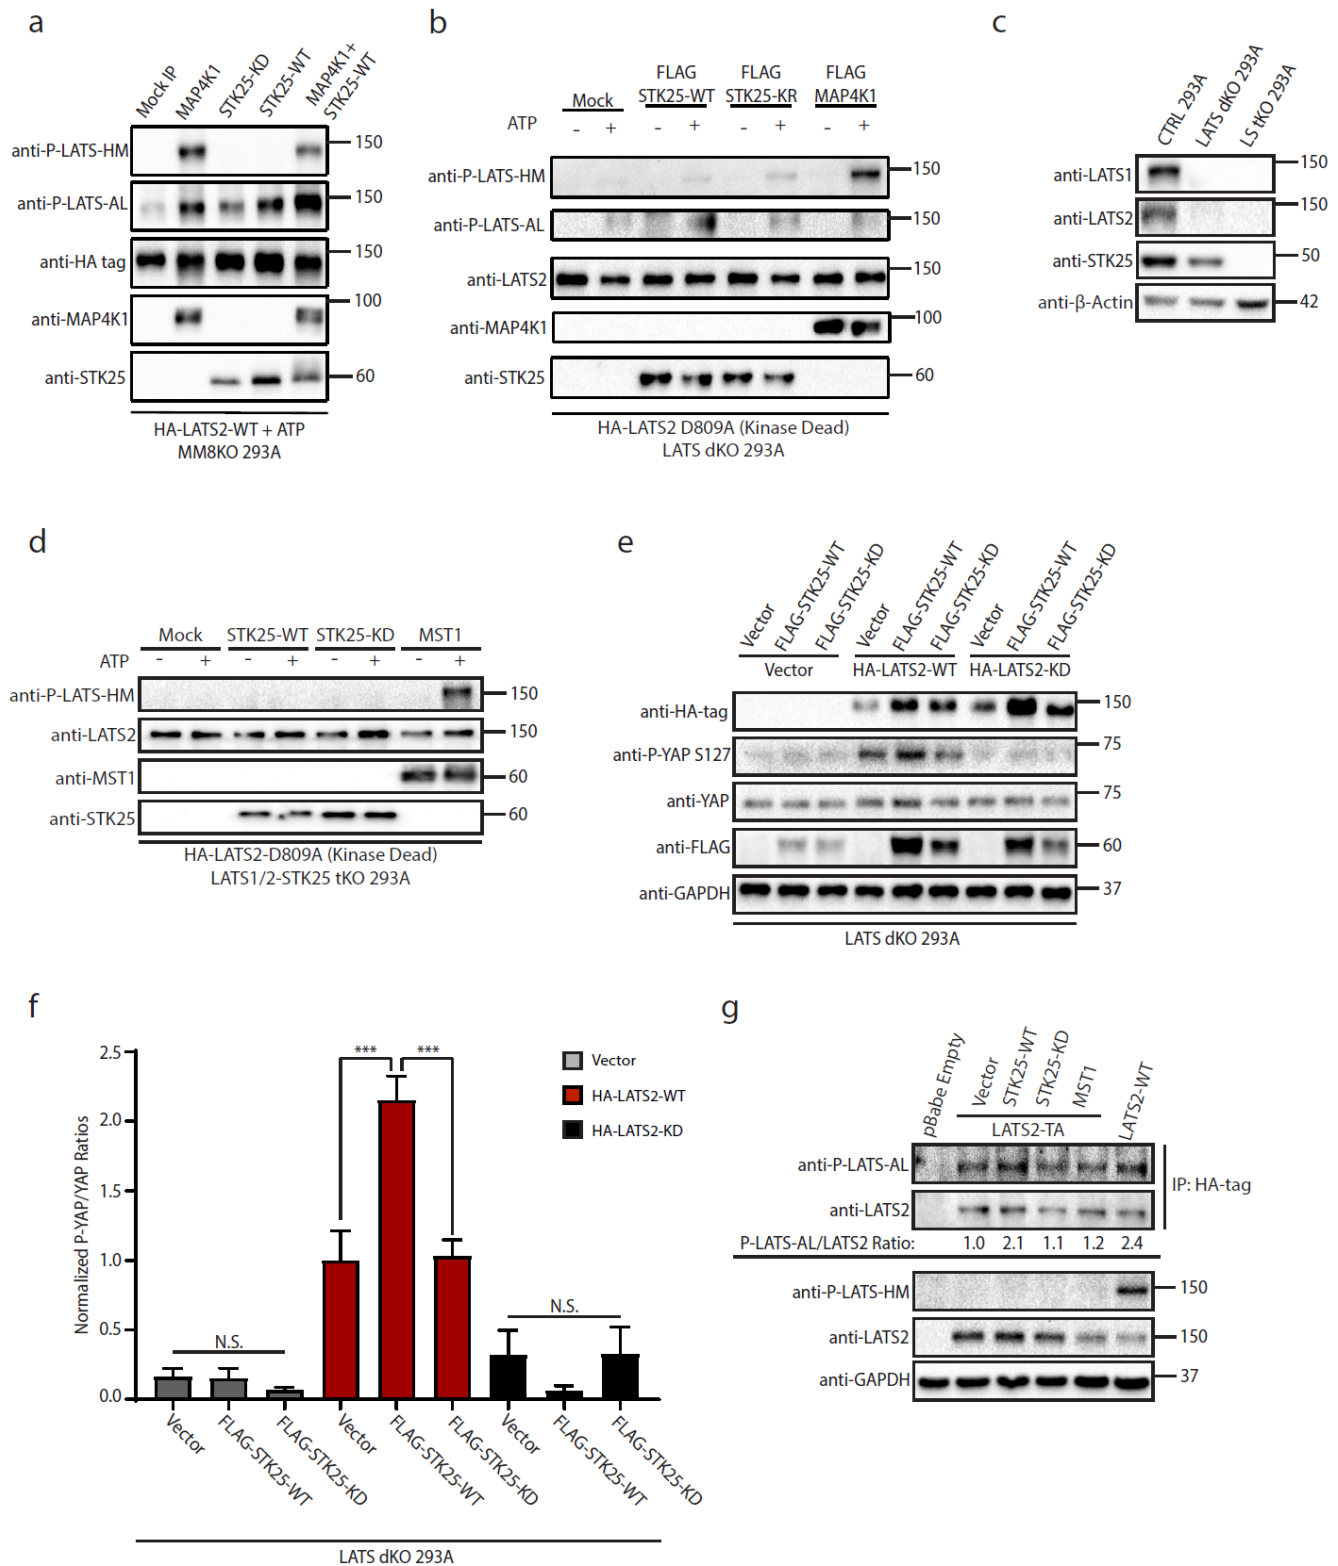

### Supplementary Figure 4. STK25 activates the LATS kinases.

**a.** IP purified wild-type LATS2 (HA-LATS2-WT) from transfected MM8KO 293A cells was co-incubated with IP purified FLAG-STK25-WT, FLAG-STK25-KD, or FLAG-MAP4K1, all from transfected MM8KO 293A. Kinase reactions were allowed to occur in the presence of 500  $\mu$ M ATP, and levels of phosphorylated LATS at the hydrophobic motif (P-LATS-HM) and activation loop motif (P-LATS-AL) were assessed via immunoblotting. A mock IP product from untransfected MM8KO 293A lysates using FLAG antibody and protein G magnetic beads served as control. **b.** IP purified kinase-dead LATS2 (HA-LATS2-KD) from transfected LATS dKO 293A cells was co-incubated with IP purified FLAG-STK25-WT, FLAG-STK25-KD, or FLAG-MAP4K1, all from

transfected LATS dKO 293A. Levels of phosphorylated LATS at the hydrophobic motif (P-LATS-HM) and activation loop (P-LATS-AL) were assessed via immunoblotting. **c.** Immunoblot to confirm absence of LATS1 and LATS2 in LATS dKO 293A cells, as well as the absence of STK25 in LATS1/2-STK25 triple KO (LS tKO) 293A cells.  $\beta$ -actin served as loading control. **d.** IP-purified kinase-dead LATS2 from transfected LS tKO 293A cells was co-incubated with IP purified FLAG-STK25-WT, FLAG-STK25-KD, or FLAG-MST1, all from transfected LS tKO 293A. Levels of phosphorylated LATS at the hydrophobic motif (P-LATS-HM) was assessed via immunoblotting. **e.** LATS dKO 293A were transfected with empty vector, wild-type LATS2 (HA-LATS2-WT), or kinase-dead LATS2 (HA-LATS2-KD), alongside Vector, wild-type STK25 (FLAG-STK25-WT), or kinase-dead STK25 (FLAG-STK25-KD). Lysates were collected and assessed via SDS-PAGE and immunoblotting for YAP phosphorylation at serine127. **f.** Quantitation of YAP phosphorylation under the various transfection conditions from **e.** are presented (n=3 biological replicates, \*\*\*p<0.001, One-Way ANOVA with Tukey's post-hoc test; DF=18, F=25.93). **g.** LATS dKO 293A were transfected with HA-tagged hydrophobic motif mutant LATS2<sup>T1041A</sup> (LATS2-TA) alongside either Vector, FLAG-STK25-WT, FLAG-STK25-KD, or FLAG-MST1. HA-tagged LATS2<sup>WT</sup> expression served as positive control. The transfected LATS2 kinases were immunoprecipitated using an anti-HA-tag antibody and assessed by immunoblotting for levels of phosphorylated LATS-AL. All data presented as mean  $\pm$  SEM.



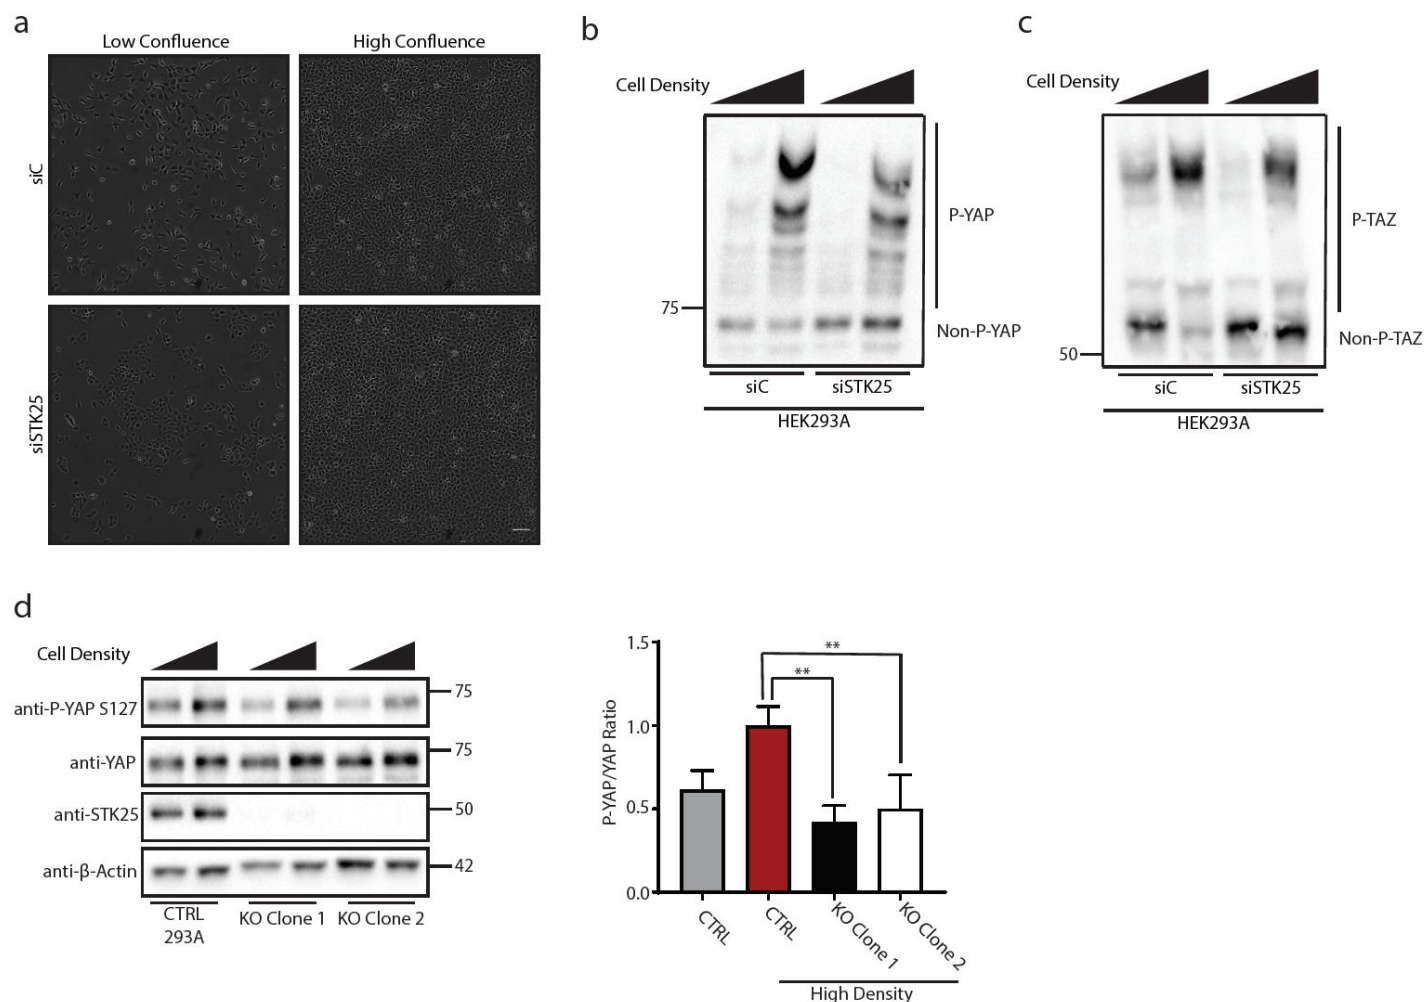

### Supplementary Figure 5. STK25 loss impairs physiologic Hippo activation.

**a.** Representative phase images of HEK293A grown to low or high confluence following transfection with the indicated siRNA. Scale bar, 100  $\mu$ m. **b.** Global phosphorylation status of YAP was assessed via phos-tag gel electrophoresis using lysates from HEK293A grown to either low or high confluence following transfection with the indicated siRNA. **c.** Global phosphorylation status of TAZ was assessed via phos-tag gel electrophoresis using lysates from HEK293A grown to either low or high confluence following transfection with the indicated siRNA. **d.** Immunoblot and quantitation of phosphorylated YAP levels under conditions of low and high confluence in either control HEK293A stably expressing Cas9 and a non-targeting sgRNA or STK25 KO 293A stably expressing Cas9 together with either sgRNA 1 (Clone 1) or sgRNA 2 (Clone 2) targeting STK25. (n=4 biological replicates; \*\*p<0.01, One-way ANOVA with Dunnett's post-hoc analysis). Data is presented as mean  $\pm$  SEM.

a

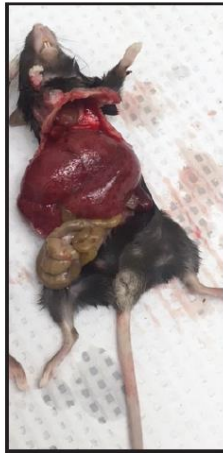

b

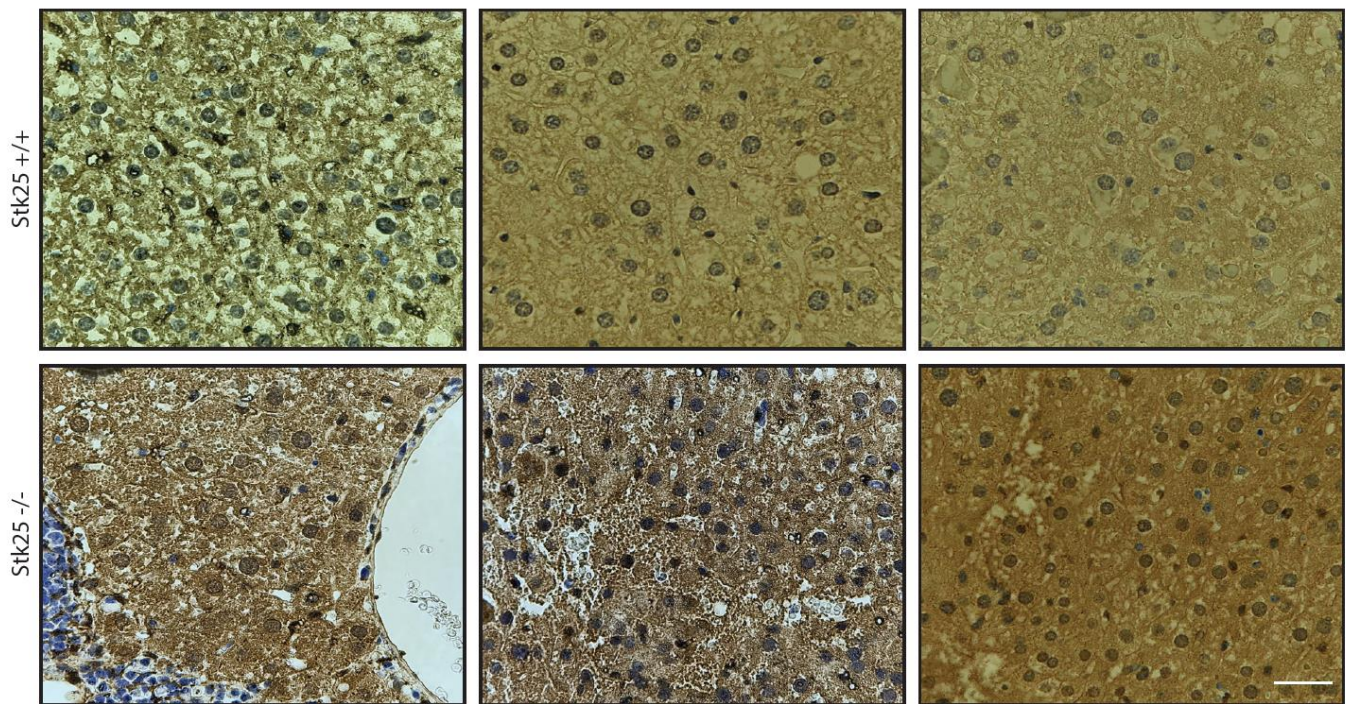

**Supplementary Figure 6. Loss of STK25 increases YAP levels *in vivo*.**

**a.** Photographic images of a *STK25*<sup>-/-</sup> female mouse that spontaneously developed massive hepatomegaly at approximately 11 months of age. **b.** Representative 40X images of IHC staining for YAP in liver sections from *STK25*<sup>+/+</sup> and *STK25*<sup>-/-</sup> mice. Each image panel was obtained from a different mouse. Scale bar, 100  $\mu$ m.

a

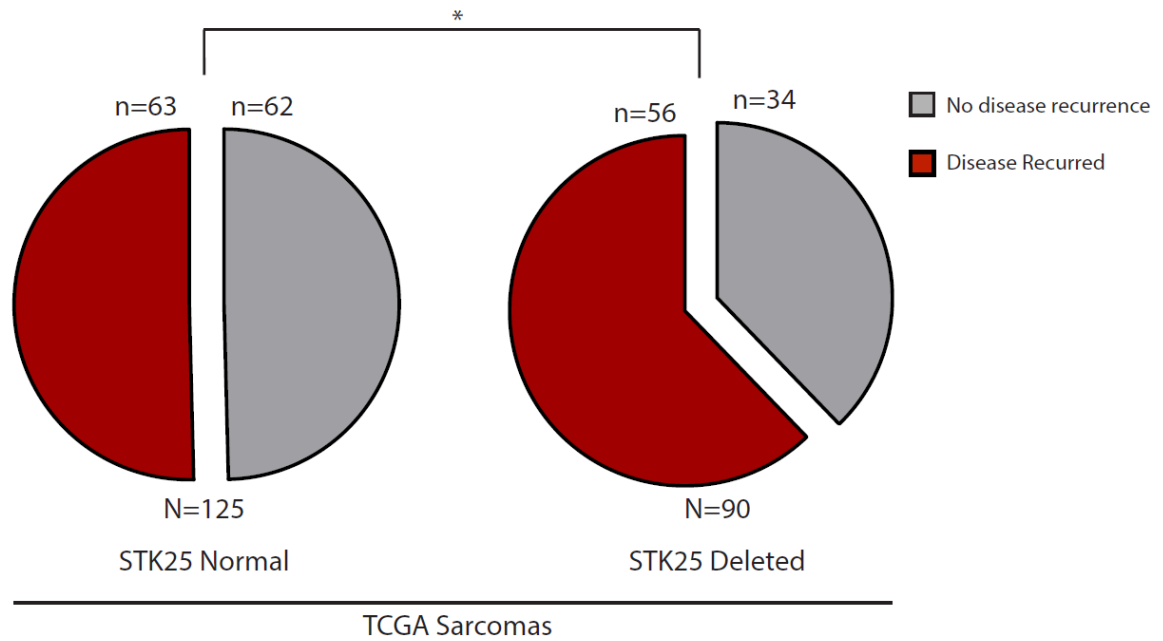

**Supplementary Figure 7. Focal deletions of identified Hippo pathway components are rare.**

**a.** Rates of recurrence-free survival in sarcoma patients with and without deletions in *STK25* (n=125 for patients without deletions, n=90 for patients with deletions, \*p<0.05, two-tailed chi-square goodness-of-fit test).

Fig. 1a

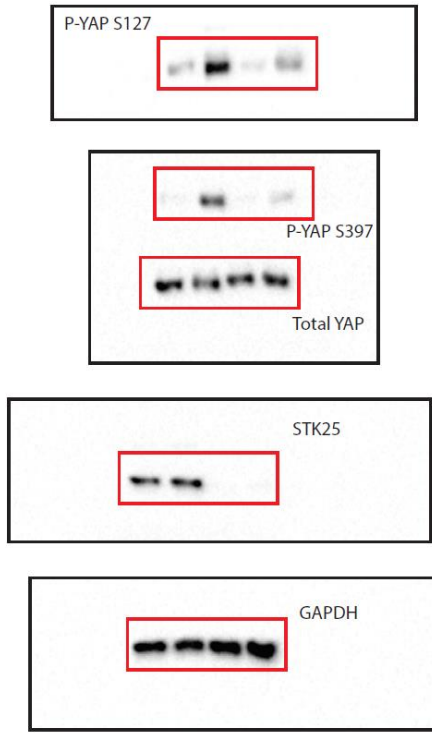

2017-02-23

Fig. 1b

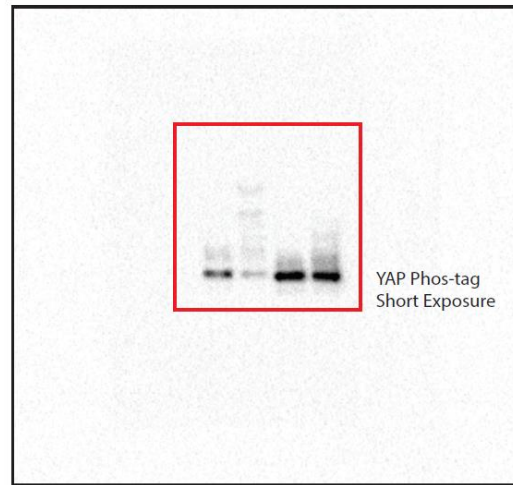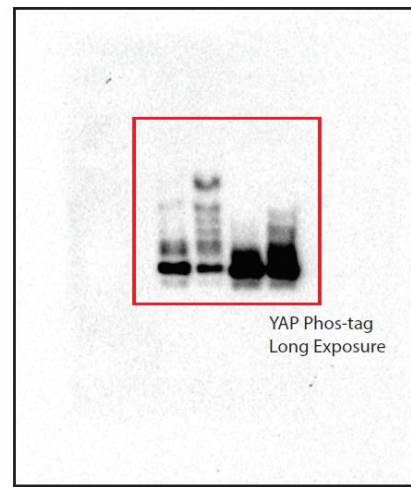

2017-02-17

Fig. 1c

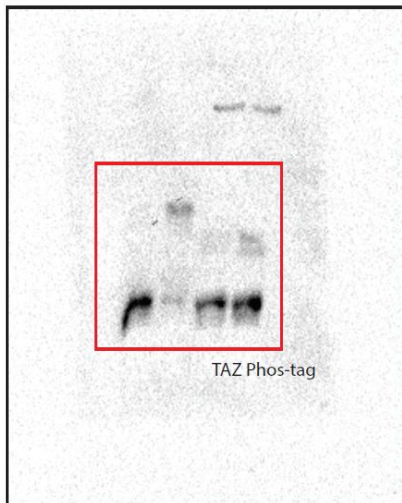

2017-02-17

Fig. 1d

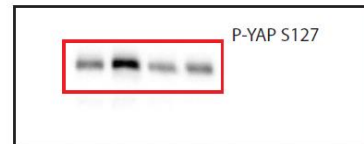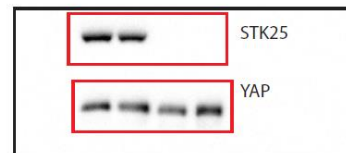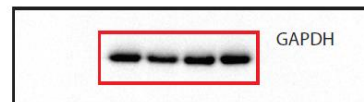

2017-07-03

Fig. 1e

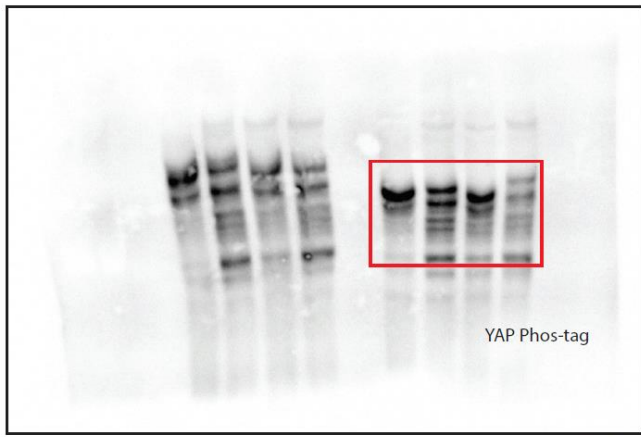

2018-11-16

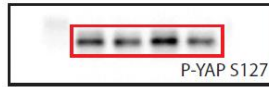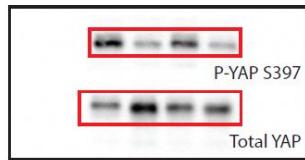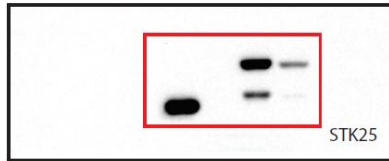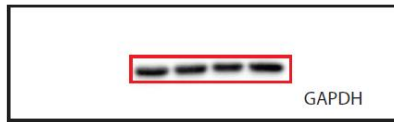

2018-11-26

Fig. 3j

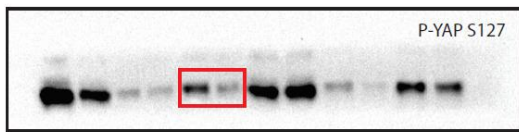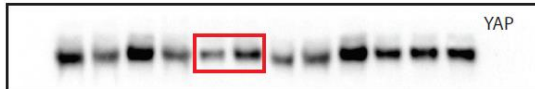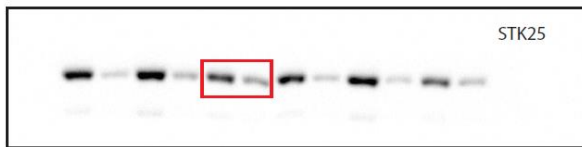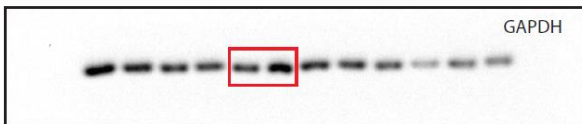

2017-04-19

Fig. 3k

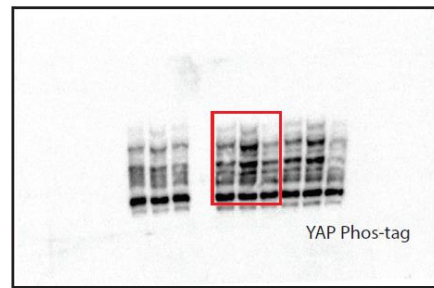

2018-12-05

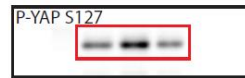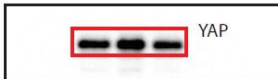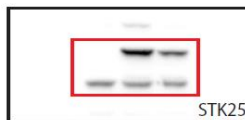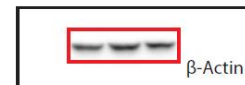

2018-12-06

Fig. 4a

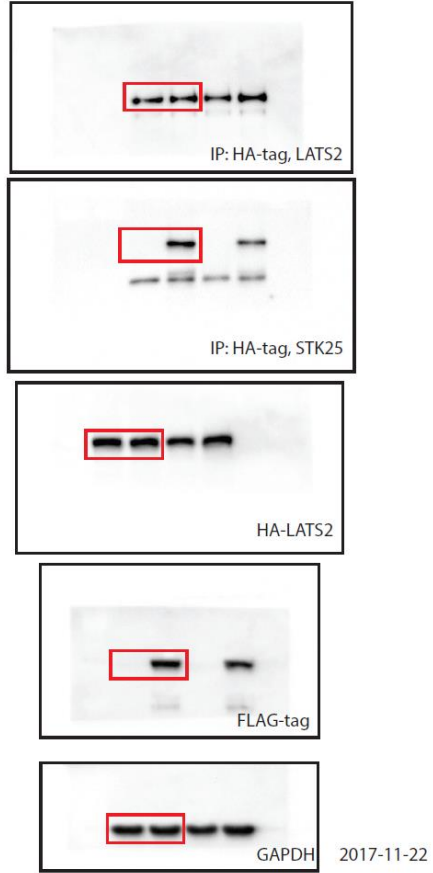

Fig. 4b

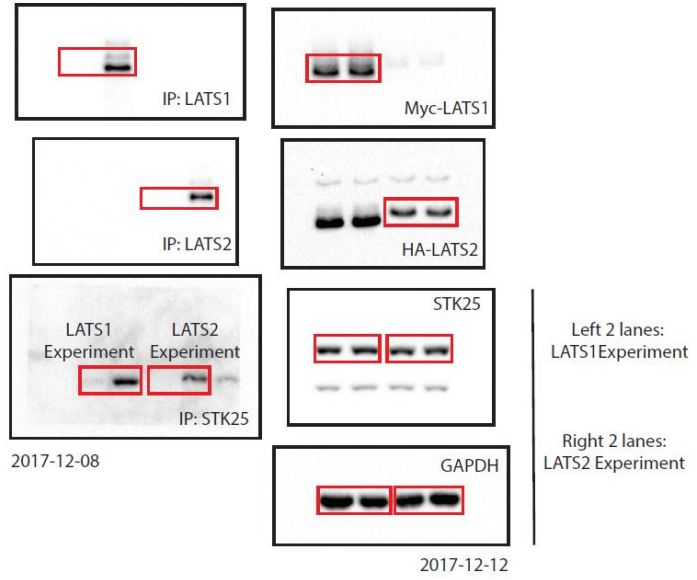

Fig. 4e

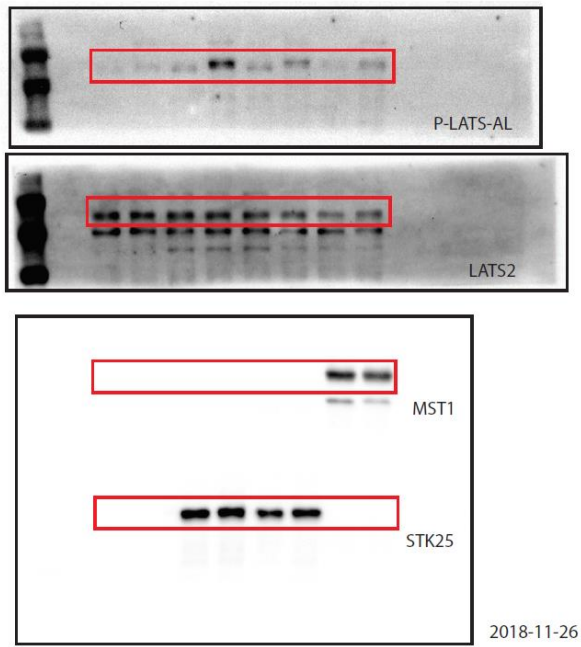

Fig. 4d

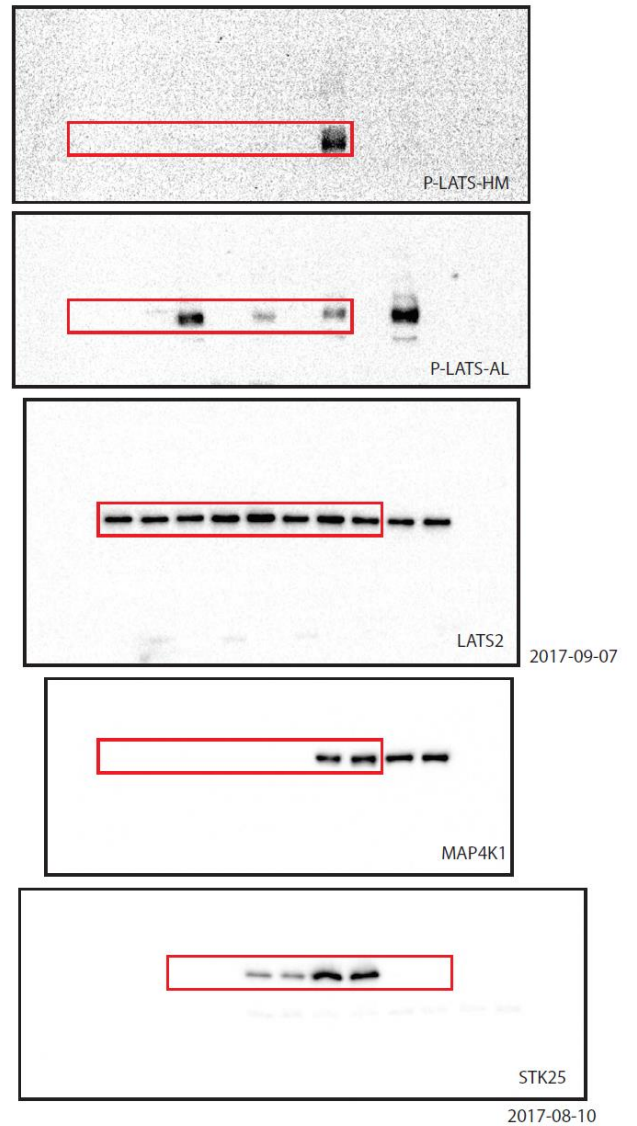

Fig. 4f

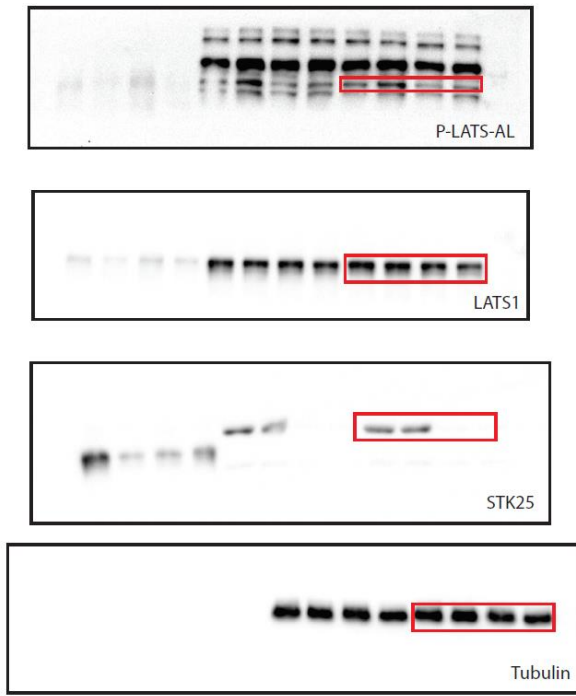

2017-05-27

Fig. 4g

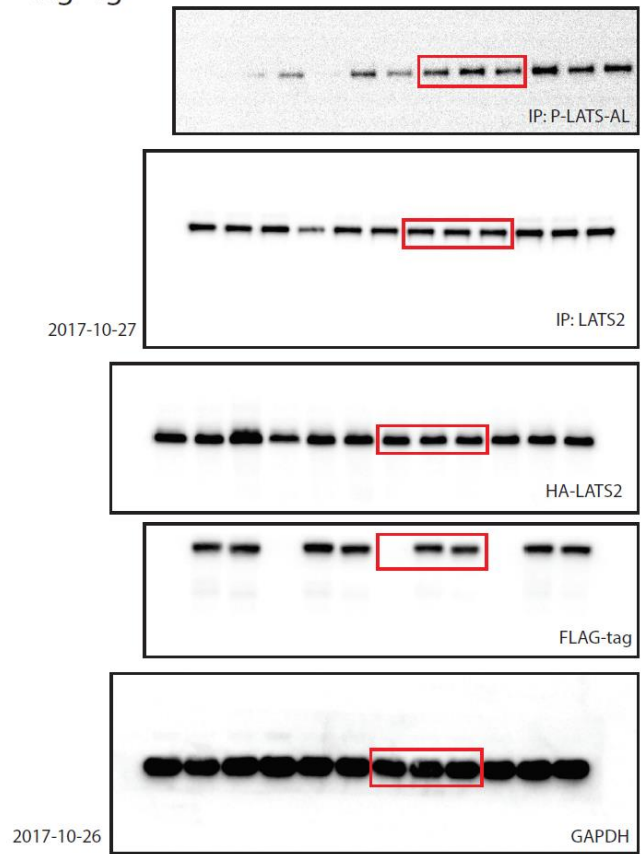

Fig. 4h

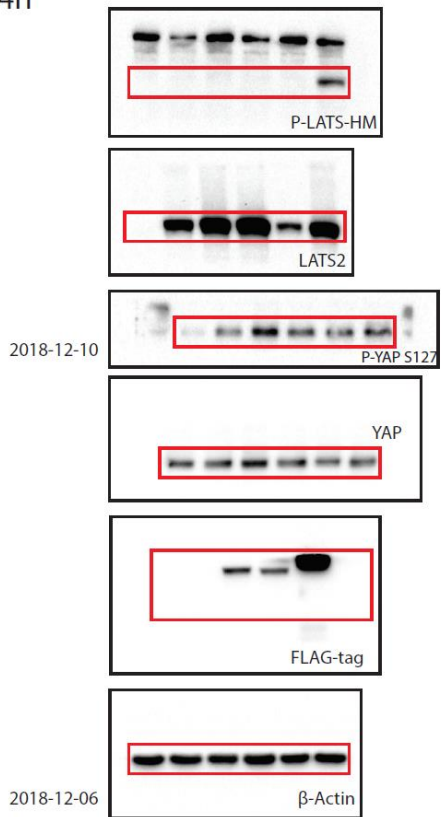

Fig. 5a

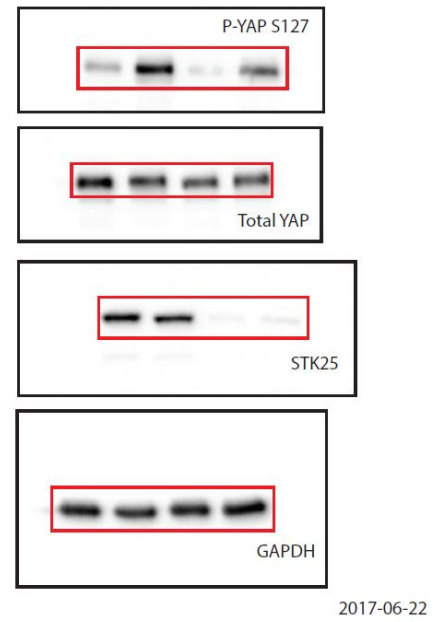

Fig. 5c

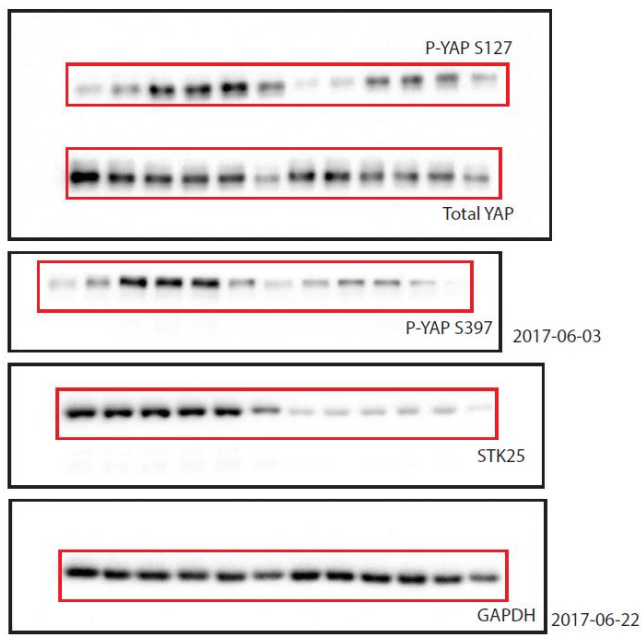

Fig. 5g

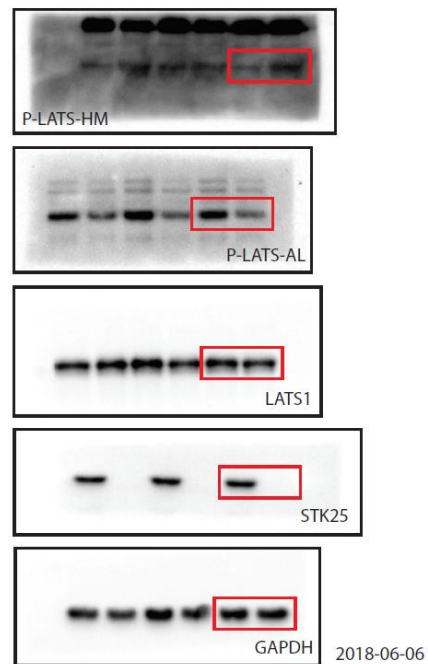

Fig. 6d

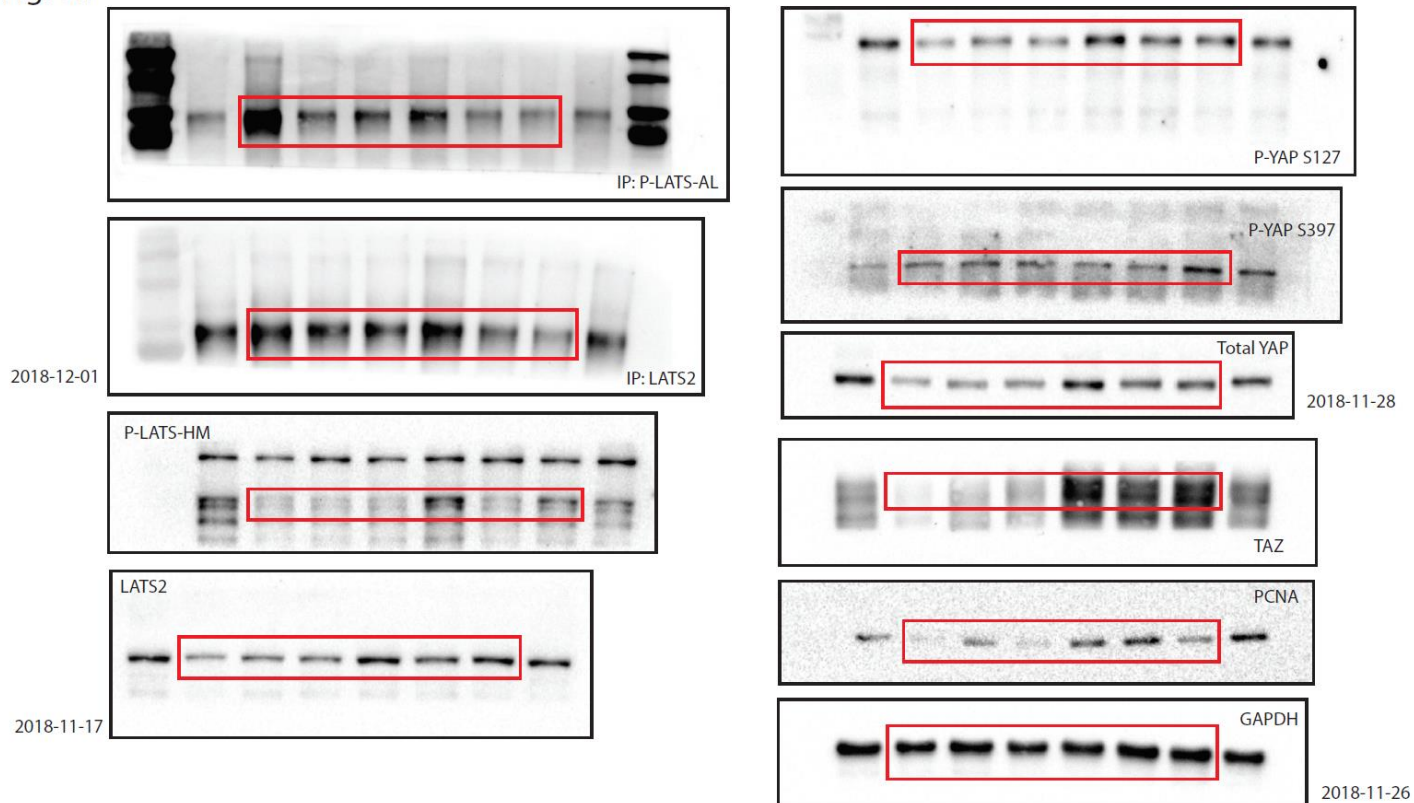

**Supplementary Figure 8. Uncropped Original Images of Immunoblots**

Uncropped digital originals from which main figure immunoblots were assembled are presented here in linear order. Please note that the auto-scale function on ImageLab was further used to process immunoblots from their original states for final figure assembly.



| Annotated Cellular Function/<br>Published YAP/TAZ gene set | Enrichment<br>Score | Normalized<br>Enrichment Score | FDR<br>q-value |
|------------------------------------------------------------|---------------------|--------------------------------|----------------|
| <b>Park et al. 2016</b>                                    | <b>0.62</b>         | <b>3.17</b>                    | <b>0.000</b>   |
| <i>HALLMARK_MYC_TARGETS_V1</i>                             | <i>0.64</i>         | <i>3.06</i>                    | <i>0.000</i>   |
| <i>HALLMARK_E2F_TARGETS</i>                                | <i>0.63</i>         | <i>3.04</i>                    | <i>0.000</i>   |
| <b>Enzo et al. 2015</b>                                    | <b>0.59</b>         | <b>3.01</b>                    | <b>0.000</b>   |
| <b>Mohseni et al. 2014</b>                                 | <b>0.55</b>         | <b>2.84</b>                    | <b>0.000</b>   |
| <b>Mori et al. 2014</b>                                    | <b>0.55</b>         | <b>2.77</b>                    | <b>0.000</b>   |
| <i>HALLMARK_OXIDATIVE_PHOSPHORYLATION</i>                  | <i>0.56</i>         | <i>2.66</i>                    | <i>0.000</i>   |
| <b>Kim et al. 2016 – YAP/TAZ</b>                           | <b>0.50</b>         | <b>2.60</b>                    | <b>0.000</b>   |
| <b>Zhang et al. 2009 – TAZ</b>                             | <b>0.48</b>         | <b>2.50</b>                    | <b>0.000</b>   |
| <i>HALLMARK_G2M_CHECKPOINT</i>                             | <i>0.51</i>         | <i>2.46</i>                    | <i>0.000</i>   |

**Supplementary Table 1. Loss of STK25 results in enrichment of active YAP/TAZ gene sets.**

Relative enrichment of active YAP/TAZ gene sets in comparison to enrichment of hallmark gene sets from the Molecular Signatures Database are shown. YAP/TAZ gene sets are in bold, while hallmark gene sets are in italics.

| Gene         | Amplified/Deleted | Q-value    | Overall Frequency |
|--------------|-------------------|------------|-------------------|
| MST1         | Neither           | N/A        | N/A               |
| MST2         | Amplified         | 1.07 E-15  | 0.4231            |
| MAP4K1       | Amplified         | 1.36 E-37  | 0.2158            |
| MAP4K2       | Neither           | N/A        | N/A               |
| MAP4K3       | Neither           | N/A        | N/A               |
| MAP4K4       | Neither           | N/A        | N/A               |
| MAP4K5       | Neither           | N/A        | N/A               |
| TNIK/MAP4K6  | Amplified         | 7.75 E-217 | 0.3284            |
| MINK1/MAP4K7 | Neither           | N/A        | N/A               |
| TAOK1        | Amplified         | 1.55 E-7   | 0.1857            |
| TAOK2        | Neither           | N/A        | N/A               |
| TAOK3        | Neither           | N/A        | N/A               |
| STK25        | Deleted           | 5.61 E-223 | 0.1892            |

**Supplementary Table 2. Recurrent focal deletions of upstream LATS activators are rare in cancers.**

Publicly available TCGA datasets were probed to assess rates of focal deletion in known upstream activators of LATS kinases, using the “All Cancers” dataset from the Tumorscape program online

(<http://www.broadinstitute.org/tcga/>).

| <b>Genes in Peak (19)</b> |
|---------------------------|
| HDLBP                     |
| SEPT2                     |
| FARP2                     |
| HSA-MIR-3133              |
| <b>STK25</b>              |
| BOK-AS1                   |
| BOK                       |
| THAP4                     |
| ATG4B                     |
| DTYMK                     |
| ING5                      |
| D2HGDH                    |
| GAL3ST3                   |
| NEU4                      |
| PDCD1                     |
| RTP5                      |
| LINC01237                 |
| AC093642.3                |
| LOC728323                 |

**Supplementary Table 3. List of genes deleted in the *STK25* focal deletion peak.**

A list of genes deleted together in the *STK25* focal deletion peak were obtained via TCGA analysis using the “All Cancers” dataset.

| <b>Targets</b>   | <b>Sequences</b>     | <b>Manufacturer</b> |
|------------------|----------------------|---------------------|
| Non-Targeting #1 | UGGUUUACAUGUCGACUAA  | Dharmacon GE        |
| STK4 SmartPool   | CCAGAGCUAUGGUCAGAUAA | Dharmacon GE        |
|                  | GCCCUCAUGUAGUCAAAUA  |                     |
|                  | GAUGGGCACUGUUCGAGUA  |                     |
|                  | UAAAGAGACCGGCCAGAUU  |                     |
| STK3 SmartPool   | GCCCAUAUGUUGUAAAGUA  | Dharmacon GE        |
|                  | CCACAAGCACGAUGAGUGA  |                     |
|                  | GAACUUUGGUCCGAUGAUU  |                     |
|                  | CAUGAACCCUUCUUAUGU   |                     |
| STK24 SmartPool  | UAUUAUGGAUCCUAUCUGA  | Dharmacon GE        |
|                  | UCGAUUAUCUCCAUCGGA   |                     |
|                  | CCAAGAAUCUCGAGAAUGG  |                     |
|                  | AGAAAGUGGUUGCCAUAUA  |                     |
| STK25 SmartPool  | CUAAAGAGCACCAAGCUAU  | Dharmacon GE        |
|                  | UCUACAAGGGCAUCGAUAA  |                     |
|                  | ACACGCAGAUUAAGAGGAA  |                     |
|                  | GCACUGGACUUGCUUAAAC  |                     |
| MAP4K1 SmartPool | GAUACAAAUGAGCUGUGUGA | Dharmacon GE        |
|                  | CAACAACGUUCUCAUGUCU  |                     |
|                  | GGAGUUAUCUCUUGGUUGCA |                     |
|                  | GAAAGGACCCUCCAUUGGG  |                     |
| MAP4K2 SmartPool | GCGCAAAGGUGGCUACAAU  | Dharmacon GE        |
|                  | GGACAGGGACACAAUCCUA  |                     |
|                  | GGAAUGACCGCUUGUGGAU  |                     |
|                  | CGCCCAAACUGAGAGAUAA  |                     |
| MAP4K3 SmartPool | CAAUCGAGCUGUUGGAUAA  | Dharmacon GE        |
|                  | GAAGUGUUGUGUUGUAAGA  |                     |
|                  | UGUUAACACUGGUGAAUUA  |                     |
|                  | GGAGCUAACAUCUAUUA    |                     |
| MAP4K4 SmartPool | GGGAAGGUCUAUCCUCUUA  | Dharmacon GE        |
|                  | GACCAACUCUGGCUUGUUA  |                     |
|                  | UAAGUUACGUGUCUACUUA  |                     |
|                  | UAUAAGGGUCGACAUGUUA  |                     |
| MAP4K5 SmartPool | GGAGAGAGAUACCGUUUUA  | Dharmacon GE        |
|                  | CGAAUCAGGUAGUUCAGUU  |                     |
|                  | GGUCAUCAACAUUCCAUA   |                     |
|                  | GAACAGUUUUUCCACGGA   |                     |
| MINK1 SmartPool  | UGAAAUACGAGCGGAUUA   | Dharmacon GE        |
|                  | UCAUGACUCUGAACCGUAA  |                     |
|                  | GGAGGACUGUAUCGCCUUA  |                     |
|                  | GAACAGCUAUGACAUCUAC  |                     |

|                 |                       |              |
|-----------------|-----------------------|--------------|
| TNIK SmartPool  | GAACAUACGGGCAAGUUUA   | Dharmacon GE |
|                 | UAAGCGAGCUCAAAGGUUA   |              |
|                 | CGACAUACCCAGACUGAUA   |              |
|                 | GACCGAAGCUCUUGGUUAC   |              |
| LATS1 SmartPool | GGUGAAGUCUGUCUAGCAA   | Dharmacon GE |
|                 | UAGCAUGGAUUUCAGUAAU   |              |
|                 | GGUAGUUCGUCUAUAUUUAU  |              |
|                 | GAAUGGUACUGGACAAACU   |              |
| LATS2 SmartPool | GCACGCAUUUACGAAUUC    | Dharmacon GE |
|                 | ACACUCACCUCGCCCAAUA   |              |
|                 | AAUCAGAUUUCCUUGUUG    |              |
|                 | GAAGUGAACCGGCAAUUGC   |              |
| TP53 SmartPool  | GAAAUUUGCGUGUGGAGUA   | Dharmacon GE |
|                 | GUGCAGCUGUGGGUUGAUU   |              |
|                 | GCAGUCAGAUCCUAGCGUC   |              |
|                 | GGAGAAUUAUUUCACCCUUC  |              |
| STK25 siGENOME  | GCGCACUGCUGUUCAGAUA   | Dharmacon GE |
|                 | UAAGAACUGUGCUGACUUG   |              |
|                 | GAAGGUGCCCUGUGCUAUG   |              |
| STK25 Flexitube | CCGGCCGAGTCCACACAGCAA | Qiagen       |
|                 | CACCAAGCTATGGATCATCAT |              |
|                 | CACGGAGCTCATCGACCGCTA |              |
|                 | AAGGGCATCGATAACCACACA |              |
|                 | AAGAACTGTGCTGACTTGGA  |              |

**Supplementary Table 4. List of siRNA sequences used in this study.**

| Targets               | Primer Sequences (5'-3') |
|-----------------------|--------------------------|
| <b>Mouse genes</b>    |                          |
| <i>Gapdh</i> Forward  | TGTTCTACCCCAATGTGT       |
| <i>Gapdh</i> Reverse  | GGTCCTCAGTGTAGCCCAAG     |
| <i>Ctgf</i> Forward   | CAAGGACCGCACAGCAGTT      |
| <i>Ctgf</i> Reverse   | AGAACAGGCGCTCCACTCTG     |
| <i>Cyr61</i> Forward  | TAAGGTCTGCGCTAAACAACCTC  |
| <i>Cyr61</i> Reverse  | CAGATCCCTTTCAGAGCGGT     |
| <i>Ankrd1</i> Forward | AAACGGACGGCACTCCACCG     |
| <i>Ankrd1</i> Reverse | CGCTGTGCTGAGAAGCTTGTCTCT |
| <i>Hprt1</i> Forward  | TCAGTCAACGGGGGACATAAA    |
| <i>Hprt1</i> Reverse  | GGGGCTGTACTGCTTAACCAG    |
| <i>Inhba</i> Forward  | TCCGAAGGATGGACCTAACTC    |
| <i>Inhba</i> Reverse  | GCTTTCTGATCGCGTTGAGAAG   |
| <i>Birc3</i> Forward  | AGAGAGGAGCAGATGGAGCA     |
| <i>Birc3</i> Reverse  | TTTGTCTTCCGGATTAGTGC     |
| <b>Human Genes</b>    |                          |
| <i>GAPDH</i> Forward  | GAGTCAACGGATTTGGTGC      |
| <i>GAPDH</i> Reverse  | CATTGATGGCAACAATATCCAC   |
| <i>CTGF</i> Forward   | CCAATGACAACGCCTCCTG      |
| <i>CTGF</i> Reverse   | TGGTGCAGCCAGAAAGCTC      |
| <i>CYR61</i> Forward  | AGCCTCGCATCCTATACAACC    |
| <i>CYR61</i> Reverse  | TTCTTTCACAAGGCGGCACTC    |
| <i>EDN1</i> Forward   | TGTGTCTACTTCTGCCACCT     |
| <i>EDN1</i> Reverse   | CCCTGAGTTCTTTTCCTGCTT    |
| <i>AMOTL2</i> Forward | TTGGAATCTGCAAATCGCC      |
| <i>AMOTL2</i> Reverse | TGCTGTTCGTAGCTCTGAG      |

**Supplementary Table 5. List of qPCR primers used in this study.**
